# Supplementary material for: Estimating mortality and disability in Peru before the COVID-19 pandemic: a systematic analysis from the Global Burden of the Disease Study 2019
Source: PubMed Central journal article supplement (PMC10325574; doi:10.3389/fpubh.2023.1189861), 2023-06-22

## Supplementary figures

Supplementary Figure 1. Population pyramid from Peru in 1990 and 2019

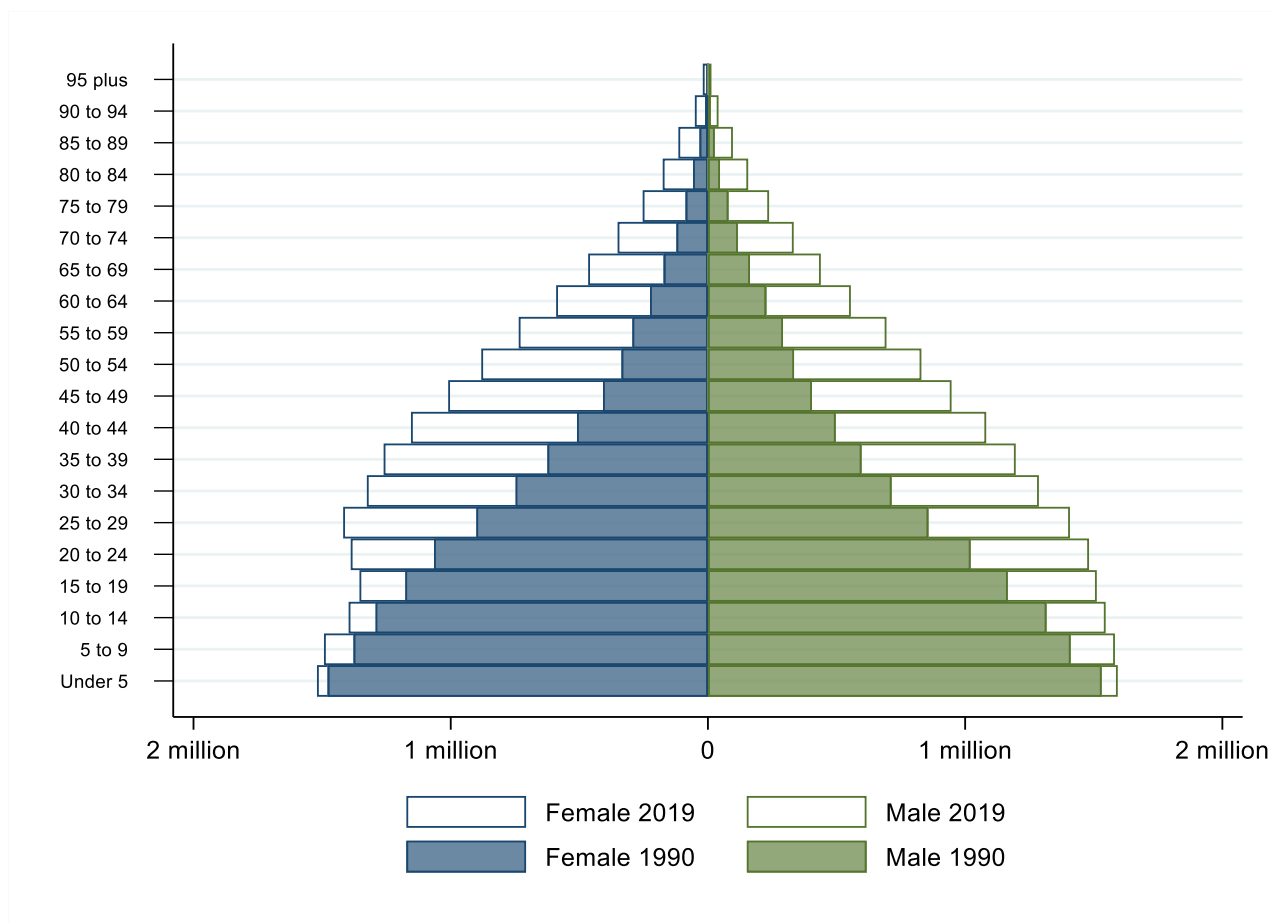

Supplementary Figure 2. Top 15th leading causes of prevalent cases in Peru (1990 and 2019), with change (%) in the number of prevalent cases and all-ages prevalence.

| Leading causes 1990                             | % of total prevalent cases | Leading causes 2019                             | % of total prevalent cases | Percentage change in number of prevalent cases, 1990–2019 | Percentage change in all ages prevalence, 1990–2019 |
|-------------------------------------------------|----------------------------|-------------------------------------------------|----------------------------|-----------------------------------------------------------|-----------------------------------------------------|
| 1 Oral disorders                                | 54.2 (49.1 to 59.0)        | 1 Oral disorders                                | 56.7 (52.2 to 61.1)        | 63.1 (57.6 to 69.1)                                       | 4.2 (0.8 to 8.1)                                    |
| 2 Tuberculosis                                  | 29.7 (26.0 to 33.6)        | 2 Headache disorders                            | 29.6 (26.6 to 32.7)        | 72.1 (65.0 to 79.9)                                       | 10.0 (5.5 to 15.0)                                  |
| 3 Headache disorders                            | 26.9 (24.0 to 29.7)        | 3 Sexually transmitted infections excluding HIV | 27.2 (24.0 to 30.9)        | 101.3 (87.7 to 115.8)                                     | 28.7 (20.0 to 37.9)                                 |
| 4 Sexually transmitted infections excluding HIV | 21.1 (19.3 to 22.9)        | 4 Gynecological diseases                        | 23.1 (21.4 to 24.8)        | 82.6 (77.0 to 88.3)                                       | 16.7 (13.1 to 20.4)                                 |
| 5 Gynecological diseases                        | 19.7 (18.1 to 21.4)        | 5 Age-related and other hearing loss            | 21.0 (19.8 to 22.3)        | 134.8 (128.8 to 141.7)                                    | 50.1 (46.3 to 54.5)                                 |
| 6 Dietary iron deficiency                       | 19.7 (17.8 to 21.7)        | 6 Hemoglobinopathies and hemolytic anemias      | 18.2 (16.2 to 20.4)        | 71.9 (65.8 to 78.1)                                       | 9.9 (6.0 to 13.9)                                   |
| 7 Hemoglobinopathies and hemolytic anemias      | 16.6 (15.1 to 18.1)        | 7 Upper digestive system diseases               | 16.3 (14.6 to 17.9)        | 105.5 (100.0 to 110.6)                                    | 31.4 (27.9 to 34.6)                                 |
| 8 Age-related and other hearing loss            | 13.9 (13.1 to 14.8)        | 8 Tuberculosis                                  | 14.2 (12.5 to 16.2)        | -25.6 (-33.2 to -16.5)                                    | -52.4 (-57.3 to -46.6)                              |
| 9 Intestinal nematode infections                | 13.0 (9.9 to 17.1)         | 9 Fungal skin diseases                          | 13.3 (11.9 to 15.1)        | 78.4 (71.6 to 85.5)                                       | 14.1 (9.7 to 18.6)                                  |
| 10 Upper digestive system diseases              | 12.4 (11.0 to 13.7)        | 10 Cirrhosis and other chronic liver diseases   | 13.1 (11.9 to 14.3)        | 137.9 (129.3 to 146.2)                                    | 52.1 (46.5 to 57.4)                                 |
| 11 Fungal skin diseases                         | 11.7 (10.2 to 13.2)        | 11 Dietary iron deficiency                      | 10.8 (9.4 to 12.2)         | -14.3 (-27.3 to 1.2)                                      | -45.2 (-53.5 to -35.3)                              |
| 12 Cirrhosis and other chronic liver diseases   | 8.6 (7.8 to 9.5)           | 12 Chronic kidney disease                       | 10.0 (8.3 to 12.3)         | 192.9 (174.7 to 212.8)                                    | 87.2 (75.6 to 100.0)                                |
| 13 Asthma                                       | 7.4 (5.8 to 9.4)           | 13 Blindness and vision loss                    | 9.1 (7.9 to 10.5)          | 120.2 (110.4 to 130.4)                                    | 40.8 (34.5 to 47.3)                                 |
| 14 Other skin and subcutaneous diseases         | 6.8 (6.6 to 7.0)           | 14 Other skin and subcutaneous diseases         | 8.7 (8.4 to 9.0)           | 100.7 (97.1 to 104.4)                                     | 28.3 (26.0 to 30.6)                                 |
| 15 Blindness and vision loss                    | 6.5 (5.7 to 7.3)           | 15 Other musculoskeletal disorders              | 6.5 (5.5 to 7.5)           | 152.6 (135.4 to 171.8)                                    | 61.5 (50.5 to 73.7)                                 |
| 16 Chronic kidney disease                       | 5.3 (4.3 to 6.8)           | 17 Intestinal nematode infections               | 6.2 (4.6 to 8.1)           | -26.2 (-51.1 to 8.7)                                      | -52.8 (-68.7 to -30.5)                              |
| 23 Other musculoskeletal disorders              | 4.0 (3.3 to 4.7)           | 23 Asthma                                       | 4.4 (3.3 to 5.9)           | -7.1 (-22.8 to 9.7)                                       | -40.6 (-50.6 to -29.9)                              |

Communicable, maternal, neonatal, and nutritional diseases  
 Non-communicable diseases

The level-3 causes of GBD disaggregation are presented. Lines between time periods connect causes; solid lines represent increases in rank, and dashed lines represent decreases.

Supplementary Figure 3. Top 15th leading causes of incident cases in Peru (1990 and 2019), with change (%) in the number of incident cases and all ages-incidences

| Leading causes 1990                              | % of total incident cases | Leading causes 2019                             | % of total incident cases | Percentage change in number of incident cases, 1990–2019 | Percentage change in all ages incidence, 1990–2019 |
|--------------------------------------------------|---------------------------|-------------------------------------------------|---------------------------|----------------------------------------------------------|----------------------------------------------------|
| 1 Upper respiratory infections                   | 48.0 (44.5 to 51.7)       | 1 Upper respiratory infections                  | 44.7 (41.6 to 48.0)       | 46.6 (38.7 to 55.3)                                      | -6.3 (-11.3 to -0.7)                               |
| 2 Diarrheal diseases                             | 13.0 (11.7 to 14.3)       | 2 Diarrheal diseases                            | 17.2 (15.6 to 18.9)       | 109.1 (92.7 to 126.2)                                    | 33.6 (23.2 to 44.6)                                |
| 3 Oral disorders                                 | 9.8 (8.4 to 11.2)         | 3 Oral disorders                                | 8.9 (7.8 to 10.1)         | 43.6 (36.5 to 52.2)                                      | -8.2 (-12.8 to -2.7)                               |
| 4 Fungal skin diseases                           | 4.5 (3.9 to 5.1)          | 4 Fungal skin diseases                          | 5.1 (4.5 to 5.8)          | 79.1 (71.4 to 86.9)                                      | 14.5 (9.6 to 19.4)                                 |
| 5 Bacterial skin diseases                        | 3.0 (2.7 to 3.2)          | 5 Bacterial skin diseases                       | 3.1 (2.9 to 3.3)          | 64.7 (60.4 to 68.9)                                      | 5.3 (2.5 to 7.9)                                   |
| 6 Urinary diseases and male infertility          | 2.0 (1.7 to 2.3)          | 6 Urinary diseases and male infertility         | 2.4 (2.1 to 2.8)          | 88.2 (70.2 to 110.2)                                     | 20.3 (8.8 to 34.3)                                 |
| 7 Lower respiratory infections                   | 1.9 (1.7 to 2.1)          | 7 Gynecological diseases                        | 1.9 (1.6 to 2.2)          | 80.9 (74.5 to 86.7)                                      | 15.6 (11.5 to 19.3)                                |
| 8 Scabies                                        | 1.7 (1.5 to 2.1)          | 8 Sexually transmitted infections excluding HIV | 1.6 (1.4 to 1.9)          | 80.5 (73.0 to 87.6)                                      | 15.3 (10.6 to 19.9)                                |
| 9 Gynecological diseases                         | 1.7 (1.4 to 1.9)          | 9 Lower respiratory infections                  | 1.6 (1.4 to 1.7)          | 34.6 (24.9 to 45.1)                                      | -14.0 (-20.2 to -7.3)                              |
| 10 Headache disorders                            | 1.4 (1.2 to 1.6)          | 10 Scabies                                      | 1.6 (1.3 to 1.8)          | 42.2 (36.1 to 48.5)                                      | -9.1 (-13.0 to -5.1)                               |
| 11 Sexually transmitted infections excluding HIV | 1.4 (1.2 to 1.7)          | 11 Headache disorders                           | 1.4 (1.3 to 1.6)          | 58.7 (49.9 to 67.0)                                      | 1.4 (-4.2 to 6.7)                                  |
| 12 Other skin and subcutaneous diseases          | 1.1 (1.0 to 1.2)          | 12 Other skin and subcutaneous diseases         | 1.4 (1.3 to 1.5)          | 99.5 (95.9 to 103.1)                                     | 27.5 (25.2 to 29.8)                                |
| 13 Otitis media                                  | 1.0 (0.6 to 1.4)          | 13 Upper digestive system diseases              | 1.1 (1.0 to 1.2)          | 101.1 (95.3 to 106.4)                                    | 28.6 (24.8 to 31.9)                                |
| 14 Upper digestive system diseases               | 0.9 (0.7 to 1.0)          | 14 Dermatitis                                   | 0.9 (0.7 to 1.0)          | 79.2 (72.9 to 85.3)                                      | 14.5 (10.5 to 18.4)                                |
| 15 Dermatitis                                    | 0.8 (0.7 to 0.9)          | 15 Otitis media                                 | 0.7 (0.5 to 1.0)          | 14.0 (10.8 to 18.9)                                      | -27.2 (-29.1 to -24.0)                             |

  

|                                                                                                                                                                                  |
|----------------------------------------------------------------------------------------------------------------------------------------------------------------------------------|
| <span style="display:inline-block; width:10px; height:10px; background-color:orange; border:1px solid black;"></span> Communicable, maternal, neonatal, and nutritional diseases |
| <span style="display:inline-block; width:10px; height:10px; background-color:lightblue; border:1px solid black;"></span> Non-communicable diseases                               |

The level-3 causes of GBD disaggregation are presented. Lines between time periods connect causes; solid lines represent increases in rank, and dashed lines represent decreases.

Supplementary Figure 4. Percentage change in the absolute number of risk-attributable DALYs in Peru from 1990-2019 due to population growth, population aging, changes in exposure to each GBD risk factor, and changes in risk-deleted DALY rates for both sexes and all causes combined.

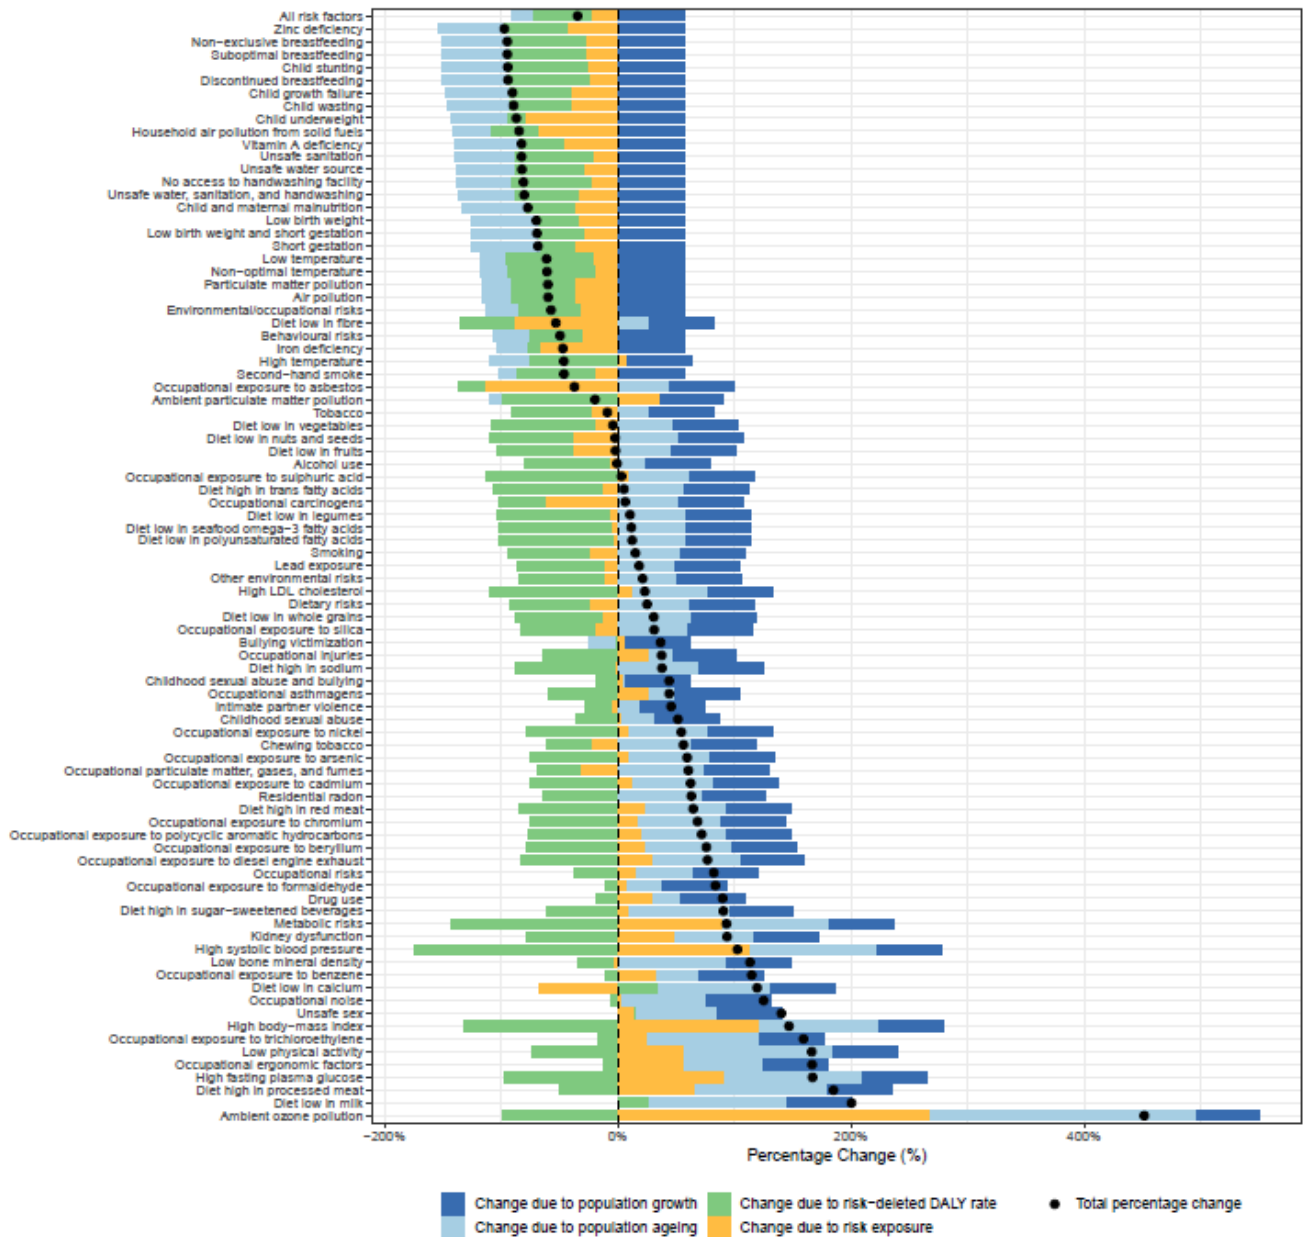

Supplementary Figure 5. Age-standardized rate of top four causes of DALYs attributable to risk factors in Peru in 1990 and 2019.

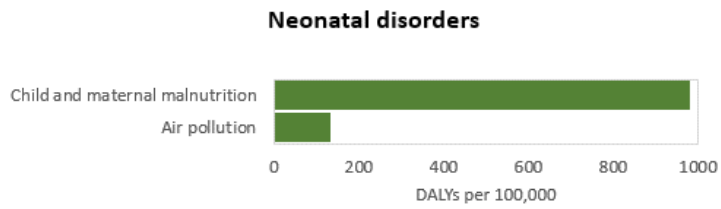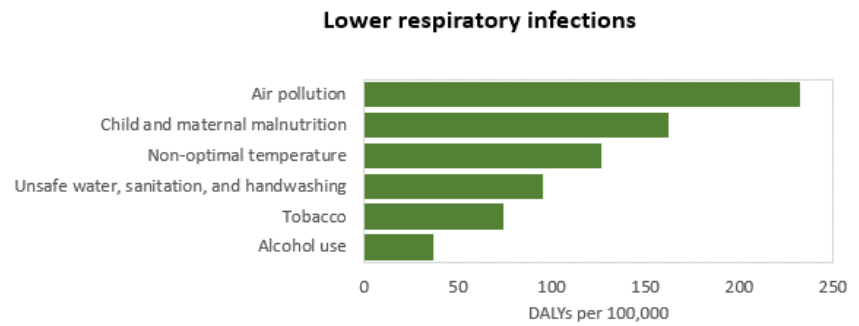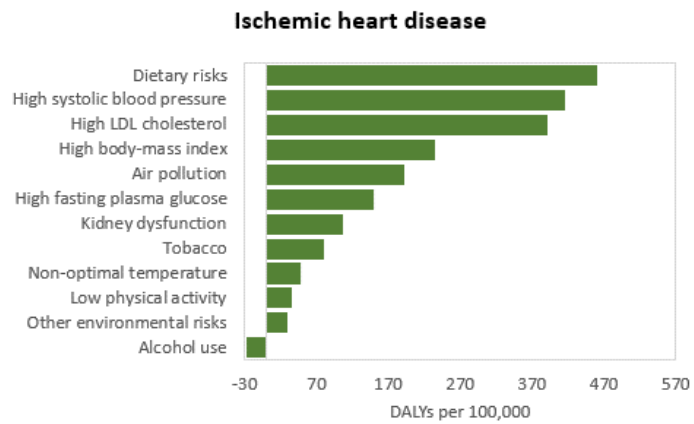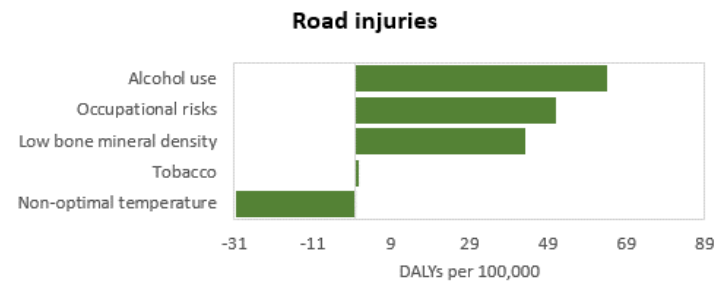

Supplement: Image_1.pdf [file Image_1.pdf]
